# Supplementary material for: Population-Based Prevalence of Ocular Chlamydia trachomatis Infection among Infants in the Trachoma Endemic Amhara Region, Ethiopia
Source: PubMed Central journal article supplement (PMC8733485; doi:10.4269/ajtmh.21-0873), 2021-10-25
Supplement: tpmd210873.SD1.pdf [file tpmd210873.SD1.pdf]

Supplemental Figure 1. Study location and district level trachomatous inflammation-follicular (TF) prevalence among children ages 1-9 years, Amhara, Ethiopia, 2018

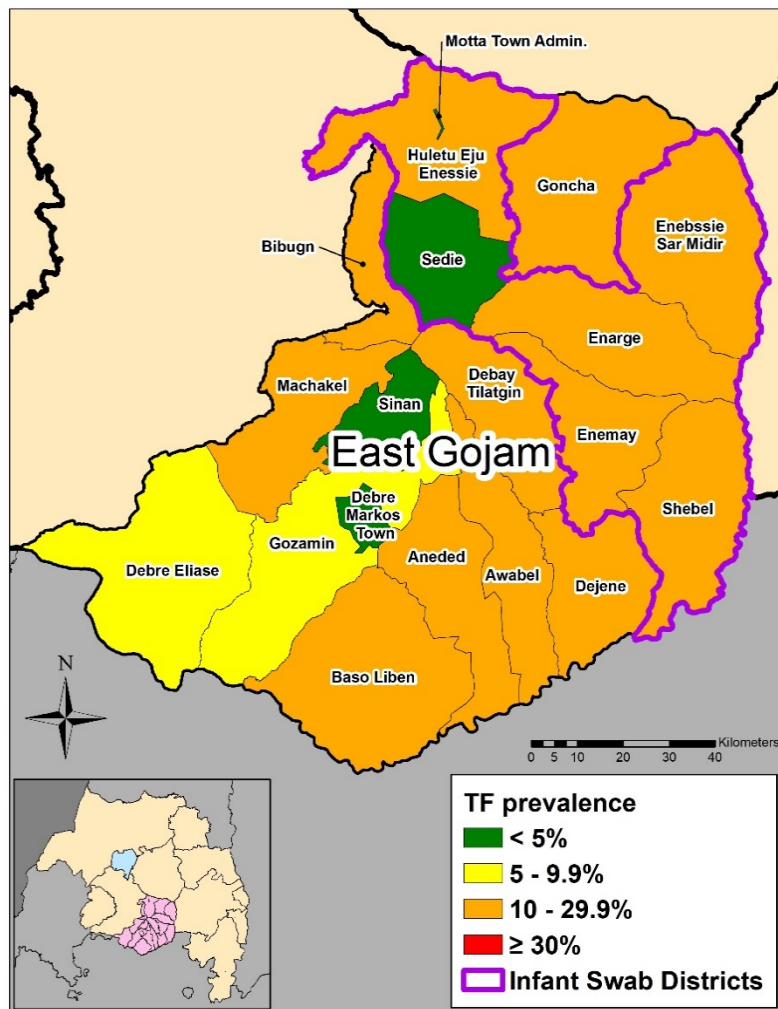

Supplemental Table 1. Trachoma prevalence data for districts included in the study enumeration unit, Amhara, Ethiopia, 2018

| District   | N, ages 1-9 y | TF 1-9 y, %<br>(95%CI) | TI 1-9 y, %<br>(95%CI) | N, ages 1-5 y | <i>Ct</i> 1-5y, %<br>(95%CI) |
|------------|---------------|------------------------|------------------------|---------------|------------------------------|
| Enarge     | 589           | 16.9%<br>(12.5-23.3)   | 2.5%<br>(1.1-4.0)      | 272           | 1.1%<br>(0.0-2.5)            |
| Enebssie   | 808           | 16.2%<br>(11.7-22.0)   | 1.0%<br>(0.4-1.8)      | 405           | 0.3%<br>(0.0-1.0)            |
| Sar Midir  |               |                        |                        |               |                              |
| Enemay     | 647           | 23.4%<br>(17.8-29.7)   | 4.0%<br>(1.8-6.6)      | 344           | 3.8%<br>(1.3-6.9)            |
| Huletu Eju | 958           | 13.4%<br>(10.0-17.7)   | 0.8%<br>(0.3-1.3)      | 490           | 1.3%<br>(0.0-3.2)            |
| Enessie    |               |                        |                        |               |                              |
| Sedie      | 863           | 4.1%<br>(2.0-6.8)      | 0.4%<br>(0.1-0.8)      | 461           | 0.0%<br>(0.0-0.0)            |
| Shebel     | 743           | 22.9%<br>(16.8-27.7)   | 1.6%<br>(0.6-3.0)      | 331           | 4.0%<br>(1.4-7.3)            |

TF = trachomatous inflammation-follicular; TI = trachomatous inflammation-intense; *Ct* = *Chlamydia trachomatis*; y = years; 95% CI = 95% confidence intervals.
